# Supplementary material for: Comparison of Clinical Manifestations, Antimicrobial Susceptibility Patterns, and Mutations of Fluoroquinolone Target Genes between Elizabethkingia meningoseptica and Elizabethkingia anophelis Isolated in Taiwan
Source: PubMed Central journal article supplement (PMC6306790; doi:10.3390/jcm7120538), 2018-12-11
Supplement: jcm-07-00538-s001.pdf [file jcm-07-00538-s001.pdf]

# Comparison of Clinical Manifestations, Antimicrobial Susceptibility Patterns, and Mutations of Fluoroquinolone Target Genes between *Elizabethkingia meningoseptica* and *Elizabethkingia anophelis* Isolated in Taiwan

**Table S1.** Primers and PCR conditions used in this study.

| Primer                                                  | Sequence (5' to 3' )                  | Amplicon size (bp) | GenBank accession no. or reference |
|---------------------------------------------------------|---------------------------------------|--------------------|------------------------------------|
| PCR of 16S rRNA                                         |                                       |                    |                                    |
| 8f                                                      | CACGGATCCAGACTTTGAT(C/T)(A/C)TGGCTCAG | 1498               | Reference 12                       |
| 1512r                                                   | GTGAAGCTTACGG(C/T)TAGCTTGTTACGACTT    |                    |                                    |
| Sequencing of 16S rRNA                                  |                                       |                    |                                    |
| 8f                                                      | CACGGATCCAGACTTTGAT(C/T)(A/C)TGGCTCAG |                    | Reference 7,10,13                  |
| 534r                                                    | ATTACCGCGGCTGCTGG                     |                    |                                    |
| 534f                                                    | CCAGCAGCCGCGGTAAT                     |                    |                                    |
| 968f                                                    | AACGCGAAGAACCTTAC                     |                    |                                    |
| 1512r                                                   | GTGAAGCTTACGG(C/T)TAGCTTGTTACGACTT    |                    |                                    |
| PCR and sequencing of QRDR for <i>E. meningoseptica</i> |                                       |                    |                                    |
| <i>gyrA</i> -f <sup>a</sup>                             | CGATGTCGGTTATTGTTTCC                  | 754                | This study                         |

|                                                    |                         |     |           |       |
|----------------------------------------------------|-------------------------|-----|-----------|-------|
| <i>gyrA</i> -r <sup>a</sup>                        | GCAGTTCTGGCAATCATTTC    |     | Accession | no.   |
| <i>gyrB</i> -f <sup>b</sup>                        | AGCGCGATGATATTCCGGTT    | 780 | NR_042267 |       |
| <i>gyrB</i> -r <sup>b</sup>                        | CCACATCGGCATCGGTCATA    |     |           |       |
| <i>parC</i> -f <sup>b</sup>                        | GTCTCCGGACTTTACCAGGA    | 477 |           |       |
| <i>parC</i> -r <sup>b</sup>                        | TGTGGAAAGACCTACCCCAAT   |     |           |       |
| <i>parE</i> -f <sup>b</sup>                        | AAGAGCCTGAAACATCAGAAGC  | 700 |           |       |
| <i>parE</i> -r <sup>b</sup>                        | CCAATAACAACCGGTTCCAG    |     |           |       |
| PCR and sequencing of QRDR for <i>E. anophelis</i> |                         |     |           |       |
| <i>gyrA</i> -f <sup>b</sup>                        | GGTTATCGTGTCCAGAGCG     | 446 |           |       |
| <i>gyrA</i> -r <sup>b</sup>                        | CCGCAATACCGGAAGTACCA    |     |           |       |
| <i>gyrB</i> -f <sup>b</sup>                        | ATACGCACGAAGGAGGTACG    | 847 | This      | study |
| <i>gyrB</i> -r <sup>b</sup>                        | CGCTCTTTCTCGTTCCATGC    |     | Accession | no.   |
| <i>parC</i> -f <sup>b</sup>                        | TGGTTTCTGGATTATGCCTCTT  | 446 | CP007547  |       |
| <i>parC</i> -r <sup>b</sup>                        | CCTACACCAATCCCTTCTACTCC |     |           |       |
| <i>parE</i> -f <sup>b</sup>                        | AAAGAGCCAGAAACATCAGAGG  | 819 |           |       |
| <i>parE</i> -r <sup>b</sup>                        | TTCTTTTCTTTCGATGTCCGTA  |     |           |       |

Abbreviations: PCR, polymerase chain reaction; rRNA, ribosomal RNA; QRDR, quinolone-resistance determining region

<sup>a</sup>The conditions were as follow: an initial extended denaturation step of 94°C for 5 min, followed by 32 cycles of 30 s at 94°C, 30 s at 50°C, 1 min at 72°C, and a final 5 min at 72°C.

<sup>b</sup>The conditions were as follows: an initial extended denaturation step of 94°C for 5 min, followed by 30 cycles of 30 s at 94°C, 30 s at 55°C, 1 min at 72°C, and a final 5 min at 72°C.

**Table S2.** Information of strains for comparison of 16S rRNA and QRDRs in *gyrA*, *gyrB*, *parC*, and *parE* in this study.

| Organism                                                               | Strain    | Isolation source    | Host                     | Collection date | Geographic location       | GenBank accession number | Release date | Modify date |
|------------------------------------------------------------------------|-----------|---------------------|--------------------------|-----------------|---------------------------|--------------------------|--------------|-------------|
| <b>16S rRNA of type strains</b>                                        |           |                     |                          |                 |                           |                          |              |             |
| <i>E. meningoseptica</i>                                               | KC1913    | Cerebrospinal fluid | <i>Homo sapiens</i>      | 1949            | Massachusetts, USA        | CP014338                 | 2017/03/09   | 2018/01/21  |
| <i>E. anophelis</i>                                                    | R26       | Host midgut         | <i>Anopheles gambiae</i> | 2006            | Sweden                    | CP023401                 | 2017/09/11   | 2017/09/20  |
| <i>E. miricola</i>                                                     | DSM 14571 | Condensation water  | Unknown                  | 1997            | Russian Space station Mir | MH789417                 | 2018/08/28   | 2018/08/28  |
| <i>E. bruuniana</i>                                                    | G0146     | Unknown             | <i>Homo sapiens</i>      | Unknown         | England, United Kingdom   | CP014337                 | 2017/03/10   | 2017/03/13  |
| <i>E. ursingii</i>                                                     | G4122     | Soil                | Unknown                  | 1964            | Odense, Denmark           | MH789420                 | 2016/01/21   | 2018/05/02  |
| <i>E. occulta</i>                                                      | G4070     | Host sputum         | <i>Homo sapiens</i>      | 1977            | Melbourne, Australia      | MH789418                 | 2017/03/08   | 2018/05/02  |
| <b>QRDRs in <i>gyrA</i>, <i>gyrB</i>, <i>parC</i>, and <i>parE</i></b> |           |                     |                          |                 |                           |                          |              |             |
| <i>E. meningoseptica</i>                                               | G4076     | Unknown             | <i>Homo sapiens</i>      | Unknown         | England, United Kingdom   | CP016376                 | 2017/03/06   | 2017/03/08  |
| <i>E. anophelis</i>                                                    | NUHP1     | Host sputum         | <i>Homo sapiens</i>      | 2012            | Singapore                 | CP007547                 | 2014/08/27   | 2017/04/02  |

Abbreviations: rRNA, ribosomal RNA; QRDR, quinolone-resistance determining region.
